# Supplementary material
Source: PubMed Central journal article supplement (PMC3193472)
Supplement: cr2011124x4.pdf [file cr2011124x4.pdf]

**Supplementary information, Table S4** Isothermal Titration Calorimetry (ITC) with 0.88mM

H3 peptide in syringe and various PHD<sub>UHRF1</sub> mutations in cell using VP-ITC

| ID | Protein in cell | Protein concentration (mM) | N             | Ka (M <sup>-1</sup> ) | Kd (μM) | Δ H (cal/mol) | Δ S (cal/mol/deg) |
|----|-----------------|----------------------------|---------------|-----------------------|---------|---------------|-------------------|
| 1  | PHD WT          | 0.05                       | 1.07±0.00398  | 1.62E6±1.04E5         | 0.62    | -5026±27.94   | 10.7              |
| 2  | D347A           | 0.05                       | 0.748±0.104   | 5.24E4±1.45E4         | 19.1    | -904.4±160.3  | 18.4              |
| 3  | E370A           | 0.05                       | 0.971±0.00434 | 8.14E5±4.08E4         | 1.23    | -4822±29.87   | 10.0              |
| 4  | D350A           | 0.04                       | 0.991±0.0455  | 8.33E4±9.97E4         | 12      | -5876±350.2   | 1.76              |
