# Supplementary material
Source: PubMed Central journal article supplement (PMC3193472)
Supplement: cr2011124x8.pdf [file cr2011124x8.pdf]

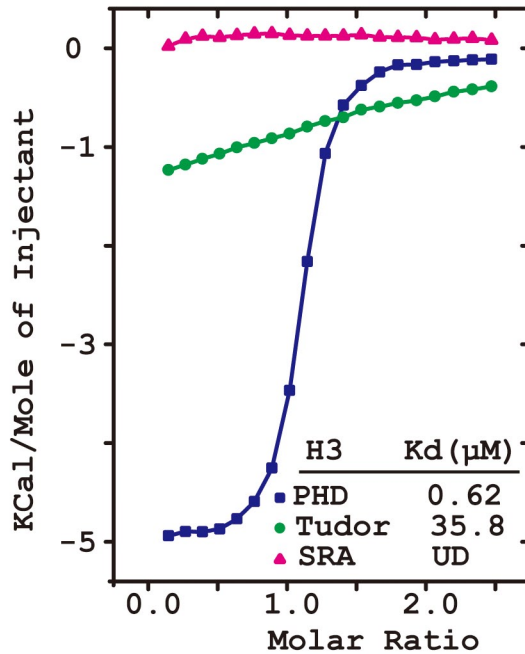

**Supplementary information, Figure S2** PHD domain of UHRF mediates the specific interaction with unmodified histone H3.

Superimposed ITC enthalpy plots for the binding of histone H3 peptide to tandem Tudor, PHD and SRA domains of UHRF1 with dissociation constant (Kd) values indicated. UD indicates undetectable. ITC parameters and results are summarized in Supplementary information, Table S2.
