# Supplementary material
Source: PubMed Central journal article supplement (PMC3193472)
Supplement: cr2011124x10.pdf [file cr2011124x10.pdf]

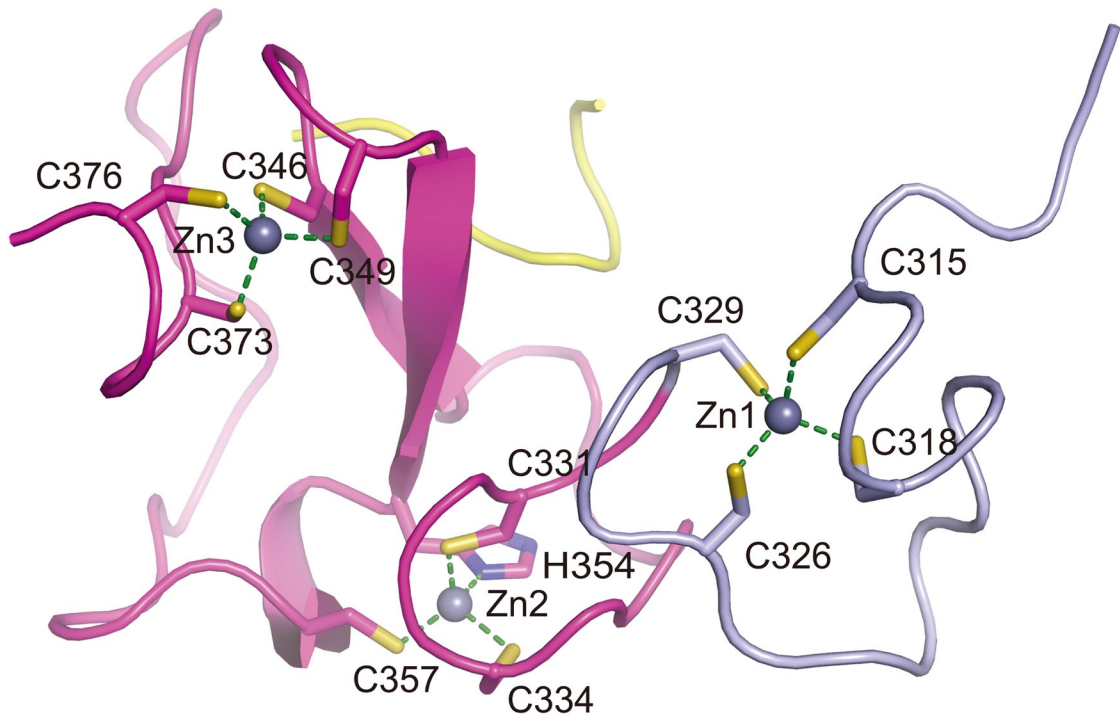

**Supplementary information, Figure S4** Zinc coordination of PHDUHRF1.

Crystal structure of PHDUHRF1 in complex with unmodified histone H3 peptide shown as ribbon representation, with PHDUHRF1 and H3 colored in purple and yellow, respectively. PHDUHRF1 residues involved in zinc atoms coordination (dashed lines) are shown in sticks representation and zinc atoms are shown as grey balls.
